# Supplementary material for: Reversal of diet-induced hepatic steatosis by peripheral CB1 receptor blockade in mice is p53/miRNA-22/SIRT1/PPARα dependent
Source: PubMed Central journal article supplement — Mol Metab. 2020 Sep 26;42:101087. doi: 10.1016/j.molmet.2020.101087 (PMC7563015; doi:10.1016/j.molmet.2020.101087), 2020-09-26
Supplement: mmc1.pdf [file mmc1.pdf]

# **Reversal of Diet-induced Hepatic Steatosis by Peripheral CB<sub>1</sub> Receptor Blockade in Mice is p53/miRNA-22/SIRT1/PPAR $\alpha$ Dependent**

Shahar Azar, Shiran Udi, Adi Drori, Rivka Hadar, Alina Nemirovski, Kiran V. Vemuri, Maya Miller, Dana Sherill-Rofe, Yhara Arad, Devorah Gur-Wahnon, Xiaoling Li, Alexandros Makriyannis, Danny Ben-Zvi, Yuval Tabach, Iddo Z. Ben-Dov, and Joseph Tam

## **Inventory of Supplemental Material:**

The following Supplemental Figures and Tables provide additional information supporting the role of hepatic CB<sub>1</sub>R in the pathogenesis of obesity-induced hepatic steatosis:

**Supplementary Figure 1.** AM6545 neither binds to nor activates PPAR $\alpha$ .

**Supplementary Figure 2.** Peripheral CB<sub>1</sub>R blockade improves the HFD-induced metabolic abnormalities in both WT and PPAR $\alpha$ <sup>-/-</sup> obese mice.

**Supplementary Figure 3.** Pharmacological blockade or genetic deletion of CB<sub>1</sub>R in the liver affects the eCB levels.

**Supplementary Figure 4.** Peripheral CB<sub>1</sub>R blockade improves the HFD-induced metabolic abnormalities in both WT and LSIRT1<sup>-/-</sup> obese mice.

**Supplementary Figure 5.** Analysis of miR-22 conservation across 113 species.

**Supplementary Figure 6.** miR-22 inhibitor and mimic-miR-22 alter miR-22 expression in HepG2 cells.

**Supplementary Figure 7.** miR-22 expression in hepatocytes is regulated by CB<sub>1</sub>R, but not by CB<sub>2</sub>R.

**Supplementary Figure 8.** Differential hepatic expression profiles of PPAR $\alpha$  and SIRT1 in humans with NAFLD.

**Supplementary Table 1.** Unfiltered and filtered coevolved genes with *CNR1*.

**Supplementary Table 2.** Enrichment analysis of 100 coevolved genes with CNR1 employing GeneAnalytics tool.

**Supplementary Table 3.** Elevated expression of hepatic microRNAs induced by AM6545 treatment.

**Supplementary Table 4.** Reduced expression of hepatic microRNAs induced by AM6545 treatment.

**Supplementary Table 5.** Primers list.

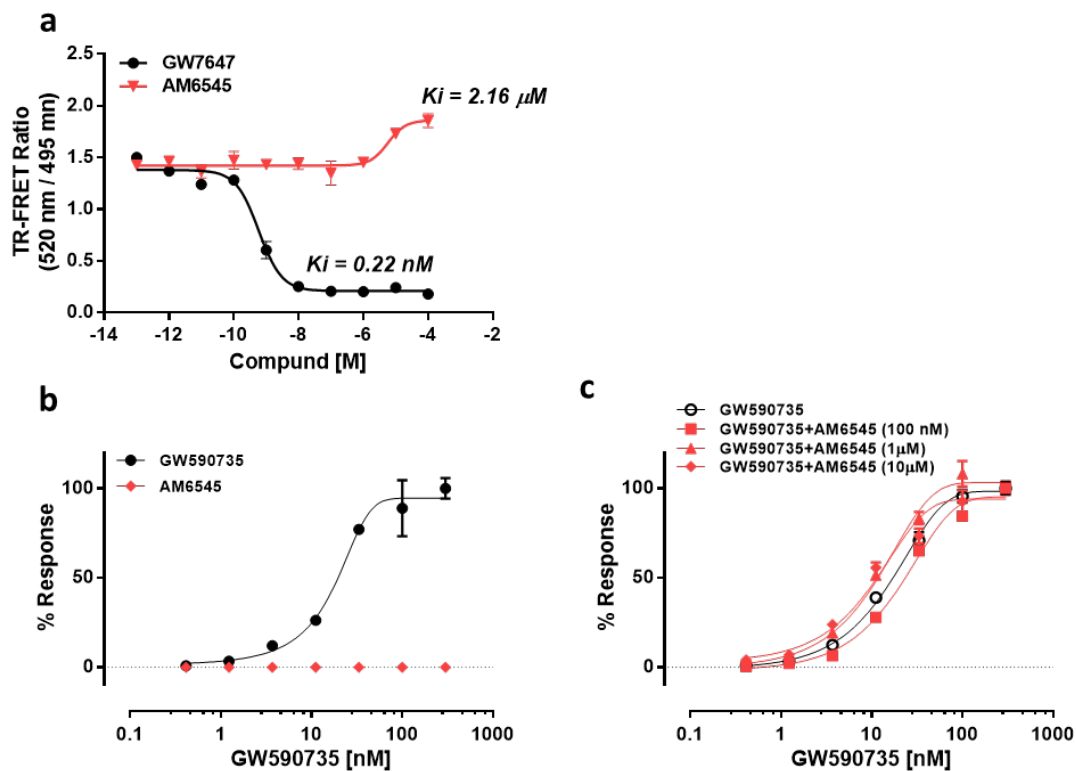

**Supplementary Figure 1. AM6545 neither binds to nor activates PPAR $\alpha$ .** (a) Competitive *in vitro* ligand binding assay for PPAR $\alpha$  with AM6545 using a PPAR $\alpha$  LanthaScreen TR-FRET assay, demonstrating that AM6545 did not affect the binding of the Fluormone™ Pan-PPAR Green tracer to recombinant PPAR $\alpha$ -LBD. For comparison, GW7645, an agonist for PPAR $\alpha$ , bound the PPAR $\alpha$ -LBD and displaced the tracer at a nanomolar range. (b) Effect of various doses of AM6545 on PPAR $\alpha$  activation. GW590735, a selective PPAR $\alpha$  agonist, but not AM6545, dose-dependently increased the activity of PPAR $\alpha$ . (c) AM6545 was not able to modulate the agonist-dependent increased activity of PPAR $\alpha$ . Data represent the mean  $\pm$  SEM from three independent experiments.

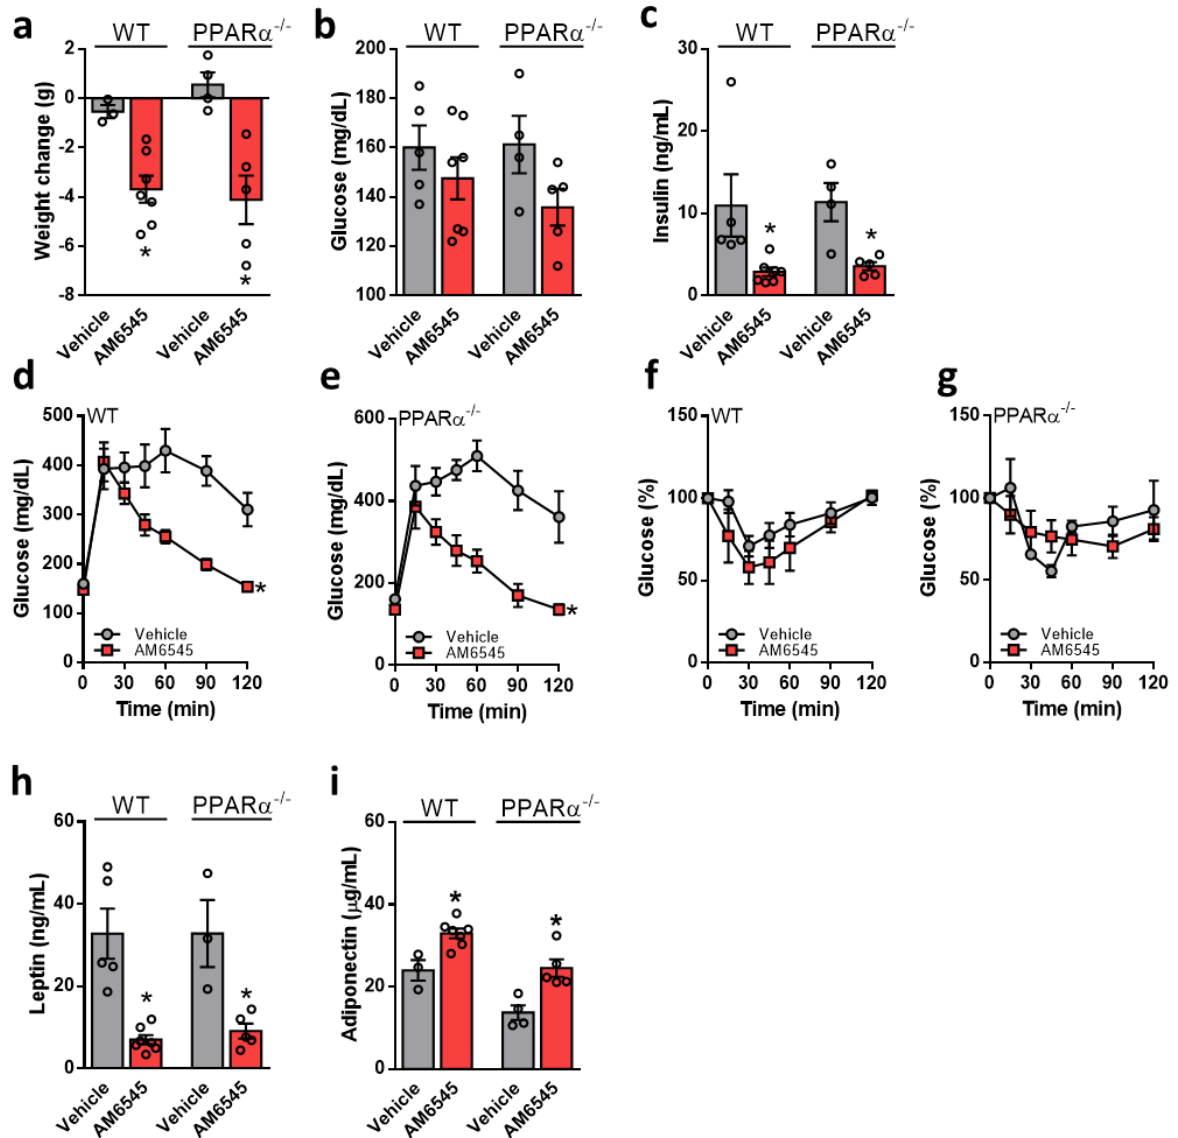

**Supplementary Figure 2. Peripheral CB<sub>1</sub>R blockade improves the HFD-induced metabolic abnormalities in both WT and PPAR $\alpha^{-/-}$  obese mice.** Male six-week-old PPAR $\alpha^{-/-}$  and their littermate control mice were fed a HFD for 14 weeks and then treated with AM6545 (10 mg/kg, ip) for 7 days. AM6545 reduced the body weight (**a**) without affecting fasting glucose levels (**b**), but significantly reduced serum insulin levels (**c**) and improved glucose tolerance (**d**, **e**) without affecting insulin sensitivity (**f**, **g**) in both mouse strains. AM6545 was equally effective in reducing the HFD-induced hyperleptinemia (**h**) and in increasing the HFD-induced hypoadiponectinemia (**i**) in WT and PPAR $\alpha^{-/-}$  obese mice. Data represent the mean  $\pm$  SEM from 5-7 mice per group. \*P<0.05 relative to the Veh-treated group from the same strain.

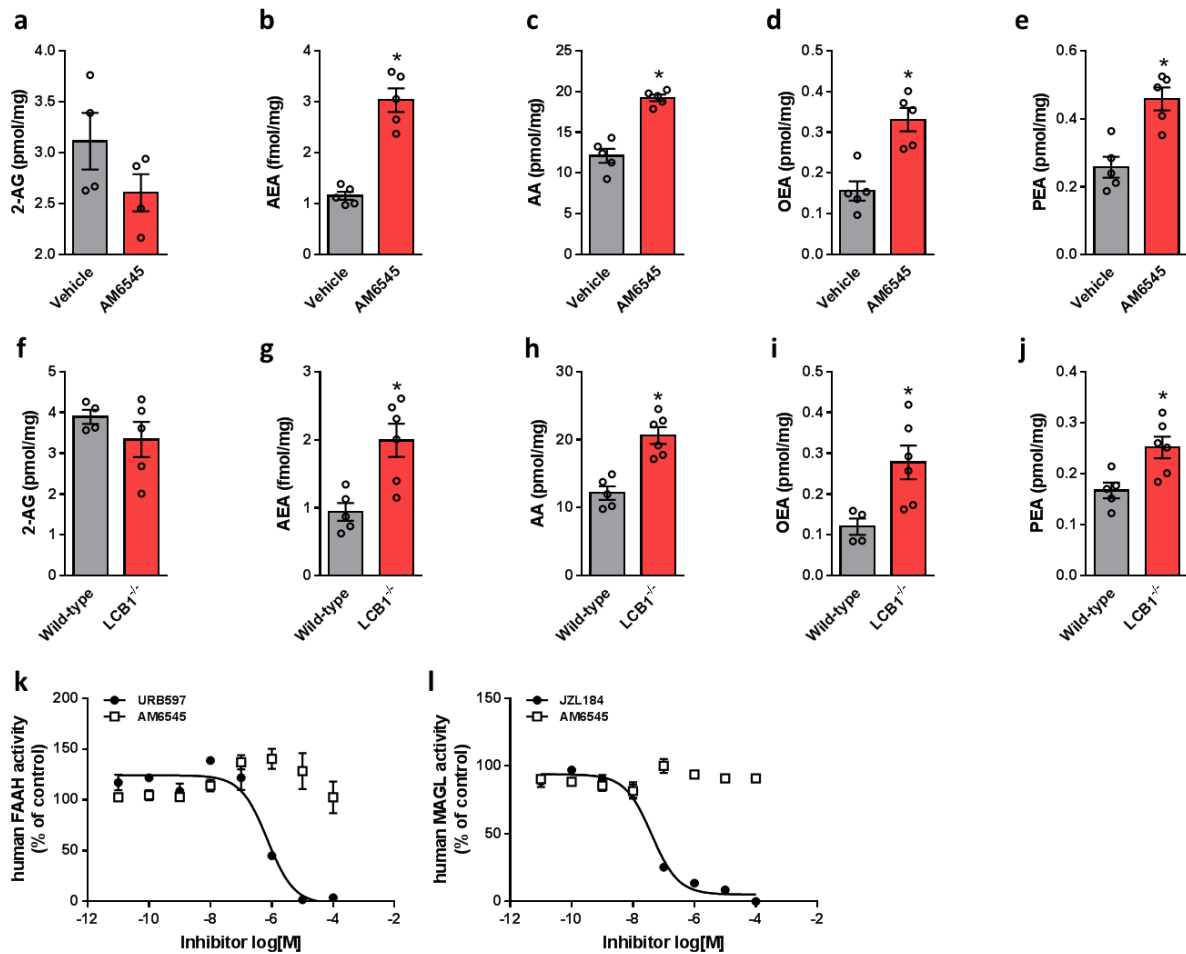

**Supplementary Figure 3. Pharmacological blockade or genetic deletion of CB<sub>1</sub>R in the liver affects the eCB levels.** Male six-week-old C57Bl/6 and LCB1<sup>-/-</sup> mice were fed a HFD for 14 weeks. Then, C57Bl/6 mice were treated with AM6545 (10 mg/kg, i.p.) for 7 days. AM6545 did not affect the hepatic levels of 2-AG (**a**); however, it significantly increased the AEA (**b**), AA (**c**), OEA (**d**), and PEA (**e**) levels. Similarly, genetic deletion of hepatic CB<sub>1</sub>R did not alter the hepatic 2-AG levels (**f**); however, significant elevations in the hepatic levels of AEA (**g**), AA (**h**), OEA (**i**), and PEA (**j**) were found in LCB1<sup>-/-</sup> mice fed a HFD vs. a STD. Note that AM6545 is not an inhibitor of both FAAH (**k**) or MAGL (**l**), compared to their potent inhibitors, URB597 and JZL184, respectively. Data represent the mean ± SEM from 4-6 mice per group. \*P<0.05 relative to the Veh-treated or the wild-type group.

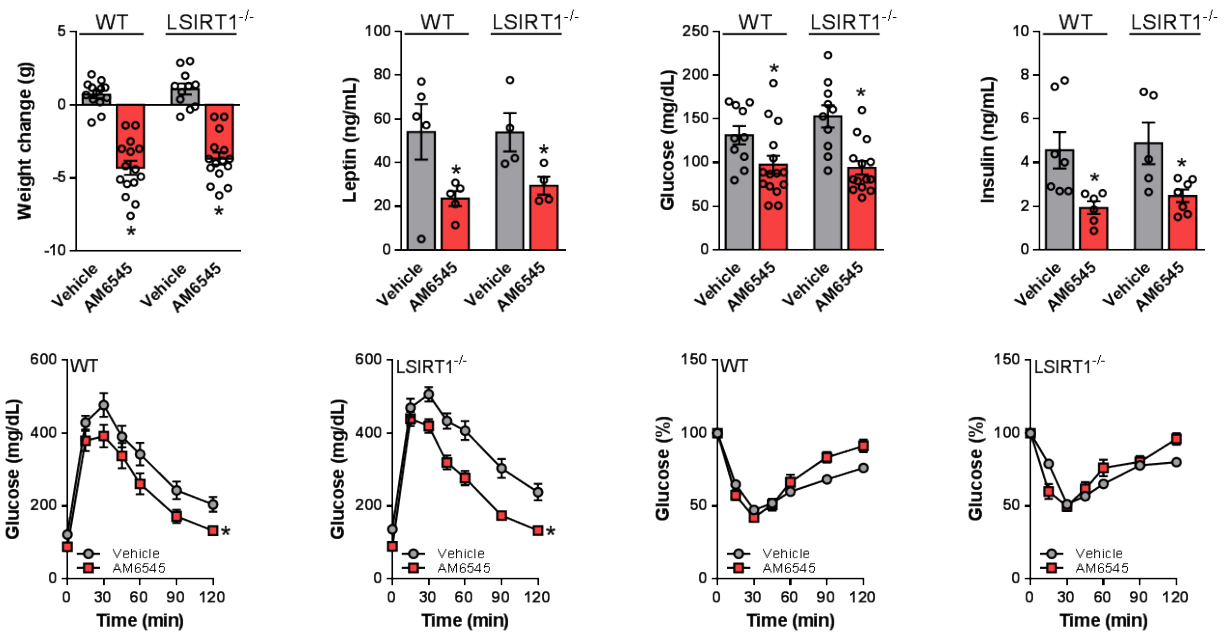

**Supplementary Figure 4. Peripheral CB<sub>1</sub>R blockade improves the HFD-induced metabolic abnormalities in both WT and LSIRT1<sup>-/-</sup> obese mice.** Male six-week-old liver-specific SIRT1 knockout (LSIRT1<sup>-/-</sup>) mice and their littermate control mice were fed a HFD for 14 weeks and then treated with AM6545 (10 mg/kg, ip) for 7 days. AM6545 reduced the body weight (**a**), hyperleptinemia (**b**), fasting glucose (**c**), and serum insulin levels (**d**), and improved glucose tolerance (**e, f**) without affecting insulin sensitivity (**g, h**) in both mouse strains. Data represent the mean ± SEM from 4-15 mice per group. \*P<0.05 relative to the Veh-treated group from the same strain.

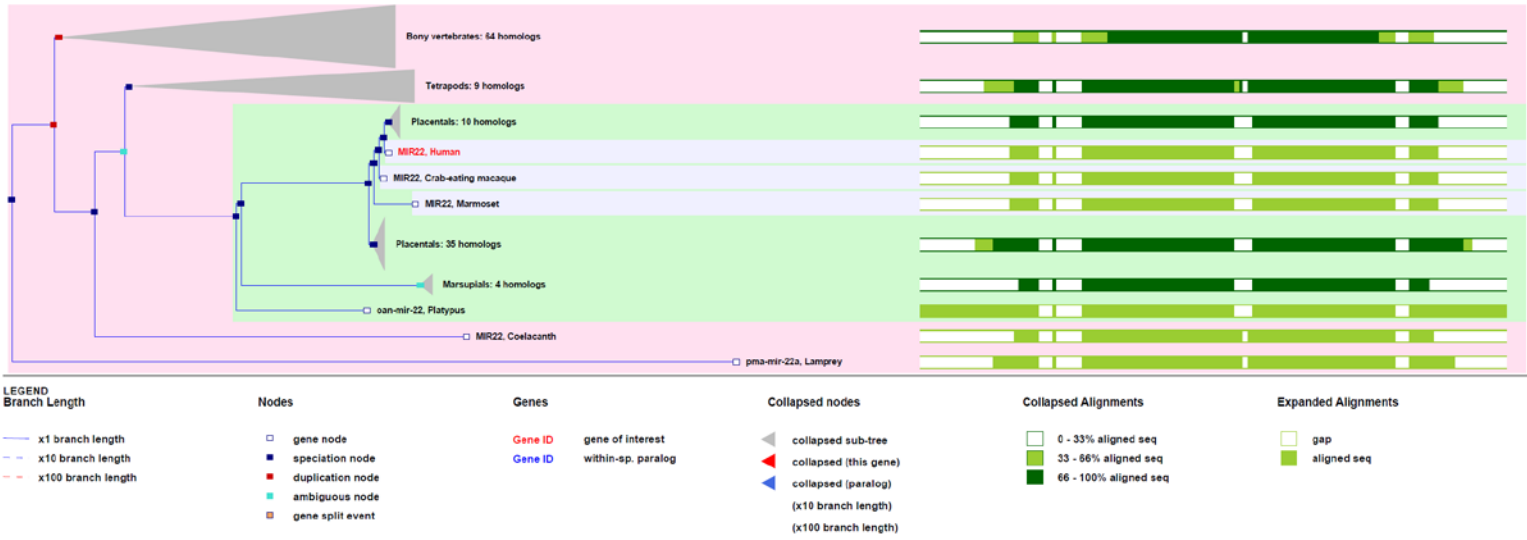

**Supplementary Figure 5. Analysis of miR-22 conservation across 113 species from Ensembl** (doi.org/10.1093/nar/gkz966). miR-22 is highly and medium conserved across most vertebrates.

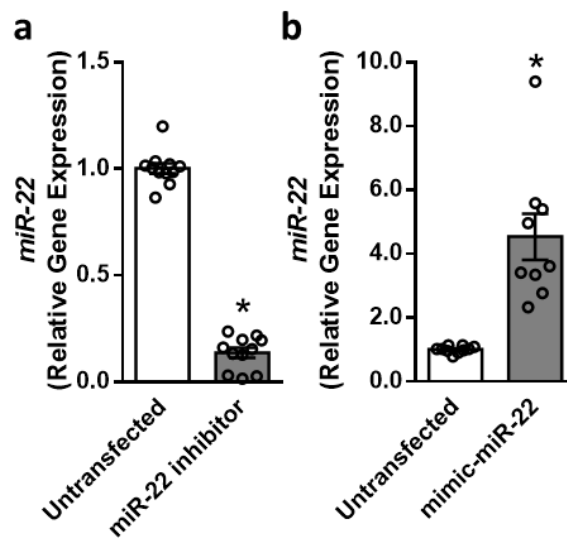

**Supplementary Figure 6. miR-22 inhibitor and mimic-miR-22 alter miR-22 expression in HepG2 cells.** (a) Transient-transfected hepatocytes with a miR-22 inhibitor reduced the endogenous expression of miR-22. (b) Transient-transfected hepatocytes with a mimic-miR-22 increased the endogenous expression of miR-22. Data represent the mean  $\pm$  SEM from three independent experiments. \*P<0.05 relative to the untransfected cells.

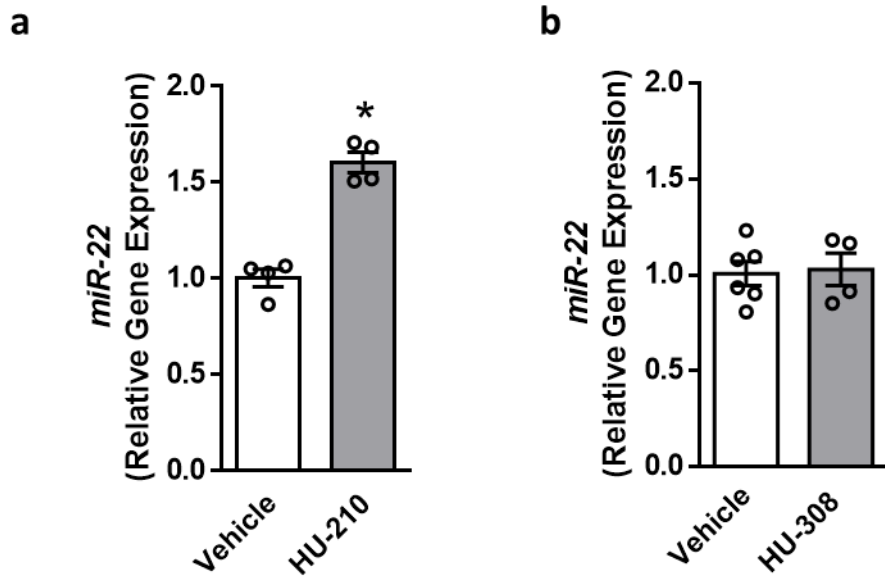

**Supplementary Figure 7. miR-22 expression in hepatocytes is regulated by CB<sub>1</sub>R, but not by CB<sub>2</sub>R.** HepG2 cells incubated with the CB<sub>1</sub>R agonist, HU-210 (100 nM) (a), and with the CB<sub>2</sub>R agonist, HU-308 (100 nM) (b) for 24 hours. HU-210 increased miR-22 expression, whereas HU-308 did not alter its expression in these cells. Data represent the mean  $\pm$  SEM. \*P<0.05 relative to Vehicle-treated group.



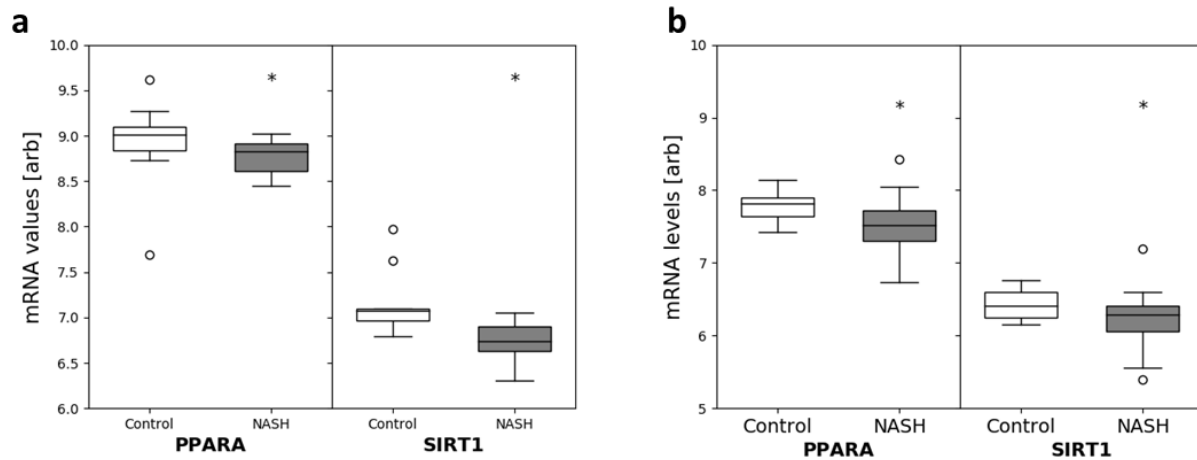

**Supplementary Figure 8.** Differential hepatic expression profiles of SIRT1, and PPAR $\alpha$  in humans with NAFLD. PPAR $\alpha$  and SIRT1 mRNA expression levels of control and NASH samples in Ahrens et al. 2013 (**a**), and Haas et al. 2019 (**b**). In Ahrens et al. 2013, control samples were obtained from exclusion of liver malignancy during oncological surgery. From Haas et al. 2019, control samples were collected from patients without NASH, w/wo T2D. Mann Whitney U test was applied for Gene level comparison of SIRT1 and PPAR between control and NASH samples. \*P<0.05 (Mann Whitney U test).

**Supplementary Table 1.** Unfiltered and filtered coevolved genes with *CNR1*

| <b>Unfiltered 100 coevolved genes with <i>CNR1</i></b> | <b>Filtered 53 coevolved genes with <i>CNR1</i></b> |
|--------------------------------------------------------|-----------------------------------------------------|
| <i>MC2R</i>                                            | <i>MC2R</i>                                         |
| <i>MC5R</i>                                            | <i>CNR2</i>                                         |
| <i>CNR2</i>                                            | <i>PTAFR</i>                                        |
| <i>MC3R</i>                                            | <i>TGFB3</i>                                        |
| <i>MC4R</i>                                            | <i>GPR1</i>                                         |
| <i>LPAR1</i>                                           | <i>FN1</i>                                          |
| <i>PTAFR</i>                                           | <i>ACKR4</i>                                        |
| <i>TGFB3</i>                                           | <i>GPR85</i>                                        |
| <i>TGFB2</i>                                           | <i>LGI2</i>                                         |
| <i>GPR12</i>                                           | <i>RXFP3</i>                                        |
| <i>OXGR1</i>                                           | <i>CDH2</i>                                         |
| <i>GPR6</i>                                            | <i>MDGA2</i>                                        |
| <i>GPR1</i>                                            | <i>LRRN3</i>                                        |
| <i>FN1</i>                                             | <i>OLFM1</i>                                        |
| <i>ACKR4</i>                                           | <i>MTNR1A</i>                                       |
| <i>LPAR3</i>                                           | <i>NETO1</i>                                        |
| <i>GPR183</i>                                          | <i>LRP12</i>                                        |
| <i>GPR85</i>                                           | <i>CDH6</i>                                         |
| <i>LGI2</i>                                            | <i>NR3C1</i>                                        |
| <i>SIPR5</i>                                           | <i>FRS2</i>                                         |
| <i>P2RY1</i>                                           | <i>P2RY14</i>                                       |
| <i>RXFP3</i>                                           | <i>ETV6</i>                                         |
| <i>CDH2</i>                                            | <i>NRP1</i>                                         |
| <i>MDGA2</i>                                           | <i>EDNRA</i>                                        |
| <i>LRRN3</i>                                           | <i>LCORL</i>                                        |
| <i>CDH4</i>                                            | <i>ITGA11</i>                                       |
| <i>LGI1</i>                                            | <i>BOC</i>                                          |
| <i>OLFM1</i>                                           | <i>OR51E1</i>                                       |
| <i>MTNR1A</i>                                          | <i>RHO</i>                                          |
| <i>NETO1</i>                                           | <i>MYBPC1</i>                                       |
| <i>MDGA1</i>                                           | <i>CADM2</i>                                        |
| <i>OLFM3</i>                                           | <i>SEMA3C</i>                                       |
| <i>GPR3</i>                                            | <i>ADGRB3</i>                                       |
| <i>LRP12</i>                                           | <i>IL1RAPL1</i>                                     |
| <i>CDH6</i>                                            | <i>OIT3</i>                                         |
| <i>NETO2</i>                                           | <i>GPR63</i>                                        |
| <i>NR3C1</i>                                           | <i>KRT8</i>                                         |
| <i>LPAR2</i>                                           | <i>DSP</i>                                          |
| <i>FRS2</i>                                            | <i>CHST1</i>                                        |
| <i>CDH11</i>                                           | <i>LRRC3B</i>                                       |
| <i>CDH10</i>                                           | <i>MIDI</i>                                         |
| <i>P2RY14</i>                                          | <i>PDGFRA</i>                                       |
| <i>ETV6</i>                                            | <i>KRT17</i>                                        |
| <i>CDH12</i>                                           | <i>ADCYAP1R1</i>                                    |

|                  |                |
|------------------|----------------|
| <i>LRRN1</i>     | <i>GPR139</i>  |
| <i>NRP1</i>      | <i>PALLD</i>   |
| <i>EDNRA</i>     | <i>PPARA</i>   |
| <i>INHBA</i>     | <i>OR52B2</i>  |
| <i>LCORL</i>     | <i>SRPX</i>    |
| <i>OLFM2</i>     | <i>GRB10</i>   |
| <i>ITGA11</i>    | <i>PROKR2</i>  |
| <i>CDH9</i>      | <i>MC1R</i>    |
| <i>BOC</i>       | <i>CCDC88A</i> |
| <i>LPAR4</i>     |                |
| <i>OR51E1</i>    |                |
| <i>CDH8</i>      |                |
| <i>CXCR4</i>     |                |
| <i>RHO</i>       |                |
| <i>MYBPC1</i>    |                |
| <i>EDNRB</i>     |                |
| <i>P2RY10</i>    |                |
| <i>P2RY4</i>     |                |
| <i>CADM2</i>     |                |
| <i>LGI3</i>      |                |
| <i>SEMA3C</i>    |                |
| <i>ADGRB3</i>    |                |
| <i>IL1RAPL1</i>  |                |
| <i>NRP2</i>      |                |
| <i>LRFN5</i>     |                |
| <i>OIT3</i>      |                |
| <i>GPR63</i>     |                |
| <i>KRT8</i>      |                |
| <i>S1PR1</i>     |                |
| <i>DSP</i>       |                |
| <i>GPR37</i>     |                |
| <i>CDH20</i>     |                |
| <i>CHST1</i>     |                |
| <i>LRRC3B</i>    |                |
| <i>MID1</i>      |                |
| <i>PDGFRA</i>    |                |
| <i>CDH18</i>     |                |
| <i>CDH1</i>      |                |
| <i>KRT17</i>     |                |
| <i>KRT19</i>     |                |
| <i>TGFB1</i>     |                |
| <i>SEMA3D</i>    |                |
| <i>CDH7</i>      |                |
| <i>ADCYAP1R1</i> |                |
| <i>NCAM1</i>     |                |
| <i>GPR139</i>    |                |
| <i>P2RY6</i>     |                |
| <i>PALLD</i>     |                |

---

*DCBLD2*

---

*PPARA*

---

*OR52B2*

---

*SRPX*

---

*GRB10*

---

*PROKR2*

---

*MC1R*

---

*CCDC88A*

---

**Supplementary Table 2.** Enrichment analysis of 100 coevolved genes with *CNR1* employing GeneAnalytics tool

|                 | Name                                                                                                             | GeneAnalytics Score* | P-value (calculated with hypergeometric test) | Matched genes                                                                                                                                                                                                                                                                                                                |
|-----------------|------------------------------------------------------------------------------------------------------------------|----------------------|-----------------------------------------------|------------------------------------------------------------------------------------------------------------------------------------------------------------------------------------------------------------------------------------------------------------------------------------------------------------------------------|
| <b>Diseases</b> | Breast Cancer                                                                                                    | 14.31                | $6.9 \times 10^{-7}$                          | <i>BOC, CDH1, CDH11, CDH2, CXCR4, EDNRA, ETV6, FN1, INHBA, KRT17, KRT19, KRT8, MDGA1, MID1, MYBPC1, NR3C1, NRP1, NRP2, PDGFRA, TGFB1, TGFB2, TGFB3</i>                                                                                                                                                                       |
|                 | Body Mass Index Quantitative Trait Locus 11 (Termed as Obesity & Energy Metabolism)                              | 10.41                | $1.2 \times 10^{-5}$                          | <i>CNR2, EDNRA, FN1, GPR183, MC1R, MC2R, MC3R, MC4R, MC5R, MID1, NR3C1, PALLD, PPARA, SEMA3C, TGFB1</i>                                                                                                                                                                                                                      |
|                 | Heart Disease (including Dilated Cardiomyopathy, Heart Disease, Arrhythmogenic Right Ventricular Cardiomyopathy) | 8.36                 | $1.4 \times 10^{-7}$                          | <i>CDH2, DSP, EDNRA, EDNRB, FN1, MYBPC1, PPARA, TGFB1, TGFB2, TGFB3, CXCR4, ITGA11</i>                                                                                                                                                                                                                                       |
|                 | Liver Disease                                                                                                    | 3.64                 | $1.7 \times 10^{-3}$                          | <i>KRT19, KRT8, PPARA, TGFB1</i>                                                                                                                                                                                                                                                                                             |
| <b>Pathways</b> | Peptide Ligand-binding Receptors                                                                                 | 94.24                | $6.2 \times 10^{-29}$                         | <i>ACKR4, GPR1, ADCYAP1R1, CNR2, GPR12, MC4R, EDNRB, GPR85, GPR183, GPR3, GPR6, GPR37, CXCR4, EDNRA, LPAR2, GPR63, MC1R, LPAR4, MTNR1A, LPAR3, LPAR1, MC3R, MC5R, P2RY6, MC2R, P2RY10, NR3C1, P2RY4, OXGR1, P2RY1, PTAFR, S1PR5, S1PR1, PROKR2, RHO, P2RY14, RXFP3</i>                                                       |
|                 | Signaling By GPCR                                                                                                | 49.68                | $3.0 \times 10^{-15}$                         | <i>BOC, ACKR4, ADCYAP1R1, CNR2, INHBA, GRB10, CDH1, MC4R, EDNRB, GPR183, GPR37, CXCR4, EDNRA, LPAR2, FRS2, FN1, MC1R, OR52B2, LPAR4, MTNR1A, NCAM1, LPAR3, LRP12, LPAR1, MC3R, MC5R, P2RY6, MC2R, P2RY10, NR3C1, NRP1, P2RY4, PDGFRA, OXGR1, P2RY1, NRP2, OR51E1, PTAFR, S1PR5, S1PR1, PROKR2, RHO, P2RY14, RXFP3, TGFB1</i> |
|                 | Developmental Biology                                                                                            | 20.1                 | $1.1 \times 10^{-6}$                          | <i>BOC, CDH4, KRT17, LGI2, GRB10, KRT19, LGI3, DSP, KRT8, LGI1, FRS2, FN1, NCAM1, CDH2, NRP1, PDGFRA, NRP2, PPARA, TGFB1</i>                                                                                                                                                                                                 |

\* The score for diseases and pathways is calculated in two different ways, and can be review at: <http://geneanalytics.genecards.org/user-guide/#1986>

**Supplementary Table 3.** Elevated expression of hepatic microRNAs induced by AM6545 treatment.

| miRBase 14            | miRBase 22      | Accession    | log2FC | pval | Ppara        |       |         |        |       | Sirt1      |              |       |         |        |       |
|-----------------------|-----------------|--------------|--------|------|--------------|-------|---------|--------|-------|------------|--------------|-------|---------|--------|-------|
|                       |                 |              |        |      | diana_microt | elmmo | miranda | pictar | pita  | targetscan | diana_microt | elmmo | miranda | pictar | pita  |
| <b>mmu-miR-223</b>    | mmu-miR-223-3p  | MIMAT0000665 | 3.44   | 0.00 |              | 0.12  |         |        | -3.56 | -0.03      |              |       | -0.18   |        |       |
| <b>mmu-miR-363</b>    | mmu-miR-363-3p  | MIMAT0000708 | 7.89   | 0.00 |              |       |         |        |       |            |              |       |         | -1.48  |       |
| <b>mmu-miR-106b*</b>  | mmu-miR-106b-3p | MIMAT0004582 | 2.8    | 0.00 |              |       |         |        |       |            |              |       |         |        |       |
| <b>mmu-miR-410</b>    | mmu-miR-410-3p  | MIMAT0001091 | 7.4    | 0.00 |              |       |         |        | 1.28  |            | 0.75         | 0.42  | -0.11   | 2.44   |       |
| <b>mmu-miR-15b</b>    | mmu-miR-15b-5p  | MIMAT0000124 | 2.09   | 0.00 | 0.46         |       |         |        | -3.21 | -0.07      |              |       |         | -2.63  |       |
| <b>mmu-miR-369-3p</b> | mmu-miR-369-3p  | MIMAT0003186 | 6.89   | 0.00 |              | 0.05  |         |        | -2.09 | -0.02      | 0.80         | 0.29  | -0.89   | 15.16  | -2.88 |
| <b>mmu-miR-326</b>    | mmu-miR-326-3p  | MIMAT0000559 | 2.52   | 0.00 |              |       |         |        | -2.50 | -0.01      | 0.48         | 0.23  |         | -4.63  |       |
| <b>mmu-miR-376c</b>   | mmu-miR-376c-3p | MIMAT0003183 | 4.44   | 0.00 |              |       |         |        | -0.13 | -0.03      | 0.54         |       |         | -2.53  |       |
| <b>mmu-miR-409-3p</b> | mmu-miR-409-3p  | MIMAT0001090 | 3.51   | 0.00 |              |       |         |        | -1.81 |            | 0.74         |       |         | -1.96  |       |
| <b>mmu-miR-654-3p</b> | mmu-miR-654-3p  | MIMAT0004898 | 3.36   | 0.00 |              |       |         |        | -1.73 |            |              |       |         | 1.49   |       |
| <b>mmu-miR-487b</b>   | mmu-miR-487b-3p | MIMAT0003184 | 4.36   | 0.00 |              |       |         |        | -5.54 |            |              |       |         | -6.00  |       |
| <b>mmu-miR-495</b>    | mmu-miR-495-3p  | MIMAT0003456 | 6.32   | 0.00 |              |       |         |        | 6.67  |            | 0.81         | 0.12  | -0.35   | -0.44  | -0.01 |
| <b>mmu-miR-451</b>    | mmu-miR-451a    | MIMAT0001632 | 1.71   | 0.00 |              |       |         |        | -1.97 |            |              |       |         |        |       |
| <b>mmu-miR-486</b>    | mmu-miR-486a-5p | MIMAT0003130 | 1.96   | 0.00 |              |       |         |        |       | -0.01      |              |       |         |        |       |

|                       |                 |              |      |      |      |      |       |       |        |       |      |      |       |      |       |       |
|-----------------------|-----------------|--------------|------|------|------|------|-------|-------|--------|-------|------|------|-------|------|-------|-------|
| <b>mmu-miR-744</b>    | mmu-miR-744-5p  | MIMAT0004187 | 2.19 | 0.00 |      |      |       |       | -15.65 |       |      |      |       |      |       |       |
| <b>mmu-miR-197</b>    | NA              | NA           | 3.13 | 0.00 |      |      |       |       |        |       |      |      |       |      |       |       |
| <b>mmu-miR-93*</b>    | mmu-miR-93-3p   | MIMAT0004636 | 3.38 | 0.00 |      | 0.08 |       |       |        | -0.05 |      |      |       |      |       |       |
| <b>mmu-miR-598</b>    | mmu-miR-598-3p  | MIMAT0004942 | 3.7  | 0.00 |      |      |       |       | -1.34  |       | 0.49 |      |       |      | -0.65 |       |
| <b>mmu-miR-431</b>    | mmu-miR-431-5p  | MIMAT0001418 | 3.21 | 0.00 |      |      |       |       | -5.52  | -0.01 |      |      |       |      |       |       |
| <b>mmu-miR-376a</b>   | mmu-miR-376a-3p | MIMAT0000740 | 5.64 | 0.00 |      |      |       |       |        |       |      |      |       |      |       |       |
| <b>mmu-miR-323-3p</b> | mmu-miR-323-3p  | MIMAT0000551 | 5.56 | 0.00 |      |      |       |       |        |       | 0.83 | 0.23 | -0.38 | 8.55 | -2.38 | -0.03 |
| <b>mmu-miR-10b</b>    | mmu-miR-10b-5p  | MIMAT0000208 | 2.64 | 0.00 |      | 0.14 |       | 1.68  | -0.20  | -0.15 |      |      |       |      |       |       |
| <b>mmu-miR-18a</b>    | mmu-miR-18a-5p  | MIMAT0000528 | 1.64 | 0.00 | 0.56 | 0.07 | -0.20 |       | -6.02  | -0.08 |      |      |       |      |       |       |
| <b>mmu-miR-505</b>    | mmu-miR-505-3p  | MIMAT0003513 | 2.66 | 0.00 |      |      |       |       | -3.67  |       |      |      |       |      | -2.97 |       |
| <b>mmu-miR-23a</b>    | mmu-miR-23a-3p  | MIMAT0000532 | 1.4  | 0.00 |      |      |       |       | 0.24   |       | 0.55 | 0.43 | -0.22 | 7.02 | -7.00 | -0.04 |
| <b>mmu-miR-652</b>    | mmu-miR-652-3p  | MIMAT0003711 | 1.54 | 0.00 | 0.60 |      |       |       | -9.25  |       |      |      |       |      |       |       |
| <b>mmu-miR-150</b>    | mmu-miR-150-5p  | MIMAT0000160 | 1.68 | 0.00 |      |      |       |       |        |       |      |      |       |      |       |       |
| <b>mmu-miR-151-5p</b> | mmu-miR-151-5p  | MIMAT0004536 | 1.47 | 0.01 |      |      |       |       | -1.82  |       |      |      |       |      |       |       |
| <b>mmu-miR-339-5p</b> | mmu-miR-339-5p  | MIMAT0000584 | 1.57 | 0.01 |      |      |       |       | -3.34  |       |      |      |       |      |       |       |
| <b>mmu-miR-9</b>      | mmu-miR-9-5p    | MIMAT0000142 | 5.48 | 0.01 |      | 0.85 |       | 12.48 | -2.17  | -0.25 | 0.96 | 0.91 | -1.18 | 8.38 | -4.71 | -0.36 |
| <b>mmu-miR-28*</b>    | mmu-miR-28a-3p  | MIMAT0004661 | 1.73 | 0.01 |      |      |       |       |        |       |      |      |       |      |       |       |

|                        |                 |              |      |      |  |      |       |       |       |       |      |      |       |      |       |       |
|------------------------|-----------------|--------------|------|------|--|------|-------|-------|-------|-------|------|------|-------|------|-------|-------|
| <b>mmu-miR-331-3p</b>  | mmu-miR-331-3p  | MIMAT0000571 | 2.33 | 0.01 |  |      |       |       | 2.34  |       |      |      |       |      |       |       |
| <b>mmu-miR-423-3p</b>  | mmu-miR-423-3p  | MIMAT0003454 | 1.43 | 0.01 |  |      |       |       |       |       |      |      |       |      |       |       |
| <b>mmu-miR-130b*</b>   | mmu-miR-130b-5p | MIMAT0004583 | 2.96 | 0.01 |  | 0.00 | -0.73 |       |       | -0.02 |      |      | -0.12 |      |       |       |
| <b>mmu-miR-485*</b>    | mmu-miR-485-3p  | MIMAT0003129 | 2.99 | 0.01 |  |      |       |       |       | -0.02 | 0.84 |      |       |      |       | -0.11 |
| <b>mmu-miR-199a-3p</b> | mmu-miR-199a-3p | MIMAT0000230 | 1.33 | 0.01 |  |      |       |       | -8.33 | -0.05 |      |      |       |      | -6.70 |       |
| <b>mmu-miR-425*</b>    | mmu-miR-425-3p  | MIMAT0001342 | 2.22 | 0.01 |  |      |       |       |       |       |      |      |       |      |       |       |
| <b>mmu-miR-484</b>     | mmu-miR-484     | MIMAT0003127 | 1.27 | 0.01 |  | 0.08 |       |       | -5.50 | -0.07 | 0.55 |      | -0.80 |      | -3.12 | -0.14 |
| <b>mmu-miR-142-5p</b>  | mmu-miR-142a-5p | MIMAT0000154 | 1.29 | 0.01 |  |      |       |       |       |       |      |      |       |      |       |       |
| <b>mmu-miR-199b</b>    | mmu-miR-199b-3p | MIMAT0004667 | 1.32 | 0.01 |  |      |       |       |       | -0.05 |      |      |       |      |       |       |
| <b>mmu-miR-133a</b>    | mmu-miR-133a-3p | MIMAT0000145 | 4.59 | 0.01 |  | 0.33 |       |       | -2.73 |       | 0.72 | 0.83 | -0.25 | 5.78 | -2.29 |       |
| <b>mmu-miR-130b</b>    | mmu-miR-130b-3p | MIMAT0000387 | 3.4  | 0.02 |  | 0.11 | -0.38 |       | -5.60 |       |      |      |       |      | -4.89 |       |
| <b>mmu-miR-324-3p</b>  | mmu-miR-324-3p  | MIMAT0000556 | 1.55 | 0.02 |  |      |       |       | -9.22 |       | 0.53 |      |       |      |       |       |
| <b>mmu-miR-144</b>     | mmu-miR-144-3p  | MIMAT0000156 | 1.31 | 0.02 |  | 0.52 |       | 17.36 | -0.67 | -0.09 |      |      | -0.57 |      | -2.54 |       |
| <b>mmu-miR-27a</b>     | mmu-miR-27a-3p  | MIMAT0000537 | 1.11 | 0.02 |  | 0.62 |       | 16.13 | -7.82 | -0.17 | 0.51 |      |       |      | -3.44 |       |
| <b>mmu-miR-128</b>     | mmu-miR-128-3p  | MIMAT0000140 | 1.6  | 0.02 |  | 0.53 |       | 13.93 | -5.48 | -0.09 | 0.77 | 0.53 | -0.73 | 4.45 | -5.98 | -0.20 |
| <b>mmu-miR-411</b>     | mmu-miR-411-5p  | MIMAT0004747 | 3.14 | 0.02 |  |      |       |       |       |       |      |      |       |      | -1.68 |       |
| <b>mmu-miR-181a-2*</b> | mmu-miR-        | MIMAT0005443 | 2.61 | 0.03 |  |      |       |       |       |       |      |      |       |      |       |       |



|                     |                 |              |      |      |      |      |       |  |       |       |      |      |       |  |             |
|---------------------|-----------------|--------------|------|------|------|------|-------|--|-------|-------|------|------|-------|--|-------------|
|                     | 181a-2-3p       |              |      |      |      |      |       |  |       |       |      |      |       |  |             |
| <b>mmu-miR-328</b>  | mmu-miR-328-3p  | MIMAT0000565 | 1.35 | 0.03 |      |      |       |  | -2.65 | -0.02 |      |      |       |  |             |
| <b>mmu-miR-196a</b> | mmu-miR-196a-5p | MIMAT0000518 | 2.31 | 0.03 | 0.47 |      | -0.20 |  | -1.37 | -0.12 | 0.54 | 0.02 | -0.19 |  | -4.32 -0.12 |
| <b>mmu-miR-92a</b>  | mmu-miR-92a-3p  | MIMAT0000539 | 1.02 | 0.03 |      |      |       |  |       |       |      |      |       |  | -6.78       |
| <b>mmu-miR-301b</b> | mmu-miR-301b-3p | MIMAT0004186 | 4.19 | 0.04 |      | 0.11 | -0.16 |  | -4.44 |       |      |      |       |  | -1.23       |
| <b>mmu-miR-379</b>  | mmu-miR-379-5p  | MIMAT0000743 | 2.47 | 0.04 |      |      |       |  | -2.20 |       |      |      |       |  |             |
| <b>mmu-miR-25</b>   | mmu-miR-25-3p   | MIMAT0000652 | 0.95 | 0.04 |      |      |       |  |       |       |      |      |       |  | -4.89       |
| <b>mmu-miR-374</b>  | mmu-miR-374b-5p | MIMAT0003727 | 1.06 | 0.05 |      |      |       |  |       |       | 0.60 |      | -0.17 |  | 0.58        |
| <b>mmu-miR-127</b>  | mmu-miR-127-3p  | MIMAT0000139 | 1.72 | 0.05 |      |      |       |  |       |       |      |      |       |  |             |
| <b>mmu-miR-99b*</b> | mmu-miR-99b-3p  | MIMAT0004525 | 2.99 | 0.05 |      |      |       |  |       |       |      |      |       |  |             |
| <b>mmu-miR-320</b>  | mmu-miR-320-3p  | MIMAT0000666 | 1.51 | 0.05 |      |      |       |  | -3.39 |       | 0.48 |      |       |  |             |

**Supplementary Table 4.** Reduced expression of hepatic microRNAs induced by AM6545 treatment.

|                      |                   |                  |               | <b>Ppara</b> |                     |              |                |               |             |                   | <b>Sirt1</b>        |              |                |               |             |                   |
|----------------------|-------------------|------------------|---------------|--------------|---------------------|--------------|----------------|---------------|-------------|-------------------|---------------------|--------------|----------------|---------------|-------------|-------------------|
| <b>miRBase 14</b>    | <b>miRBase 22</b> | <b>Accession</b> | <b>log2FC</b> | <b>pval</b>  | <b>diana_microt</b> | <b>elmmo</b> | <b>miranda</b> | <b>pictar</b> | <b>pita</b> | <b>targetscan</b> | <b>diana_microt</b> | <b>elmmo</b> | <b>miranda</b> | <b>pictar</b> | <b>pita</b> | <b>targetscan</b> |
| <b>mmu-miR-205</b>   | mmu-miR-205-5p    | MIMAT0000238     | -6.17         | 0.00         |                     |              |                |               | -3.07       |                   |                     |              |                |               |             |                   |
| <b>mmu-miR-802</b>   | mmu-miR-802-5p    | MIMAT0004188     | -1.79         | 0.00         |                     |              |                |               | -3.40       | -0.01             | 0.70                |              |                |               | 1.17        |                   |
| <b>mmu-miR-203</b>   | mmu-miR-203-3p    | MIMAT0000236     | -1.87         | 0.00         |                     | 0.17         |                |               | -0.88       |                   |                     | 0.17         |                |               | -1.39       |                   |
| <b>mmu-miR-497</b>   | mmu-miR-497a-5p   | MIMAT0003453     | -1.8          | 0.00         |                     |              |                |               |             | -0.05             |                     |              |                |               |             |                   |
| <b>mmu-miR-29b</b>   | mmu-miR-29b-3p    | MIMAT0000127     | -1.47         | 0.00         |                     | 0.33         |                |               | -3.91       | -0.07             | 0.55                | 0.69         | -0.20          |               | 3.17        | -0.10             |
| <b>mmu-miR-195</b>   | mmu-miR-195a-5p   | MIMAT0000225     | -1.79         | 0.00         | 0.50                |              |                |               | -0.08       | -0.06             |                     |              |                |               | -3.83       |                   |
| <b>mmu-miR-214*</b>  | mmu-miR-214-5p    | MIMAT0004664     | -4.19         | 0.00         |                     |              |                |               |             | -0.12             |                     |              |                |               |             |                   |
| <b>mmu-miR-99a</b>   | mmu-miR-99a-5p    | MIMAT0000131     | -1.39         | 0.00         |                     |              |                |               | -3.94       | -0.34             |                     |              |                |               |             |                   |
| <b>mmu-miR-148a*</b> | mmu-miR-148a-5p   | MIMAT0004617     | -3.11         | 0.00         |                     | 0.21         |                |               |             |                   | 0.82                | 0.24         |                |               |             |                   |
| <b>mmu-miR-143</b>   | mmu-miR-143-3p    | MIMAT0000247     | -1.24         | 0.01         |                     |              |                |               | -6.40       |                   |                     |              |                |               | -4.03       |                   |
| <b>mmu-miR-378</b>   | mmu-miR-378a-3p   | MIMAT0003151     | -1.13         | 0.01         |                     |              |                |               |             | -0.05             |                     |              |                |               |             |                   |
| <b>mmu-let-7c</b>    | mmu-let-7c-5p     | MIMAT0000523     | -1.11         | 0.01         |                     | 0.87         | -0.12          | 14.68         | -5.87       | -0.18             |                     |              | -0.13          |               |             |                   |
| <b>mmu-miR-149</b>   | mmu-miR-149-5p    | MIMAT0000159     | -1.44         | 0.01         |                     |              |                |               | -5.73       | -0.02             | 0.55                |              |                |               | -4.16       |                   |
| <b>mmu-miR-193</b>   | mmu-miR-193a-3p   | MIMAT0000223     | -1.27         | 0.01         |                     |              |                |               | -0.79       | -0.03             |                     |              |                |               |             |                   |

|                       |                  |              |       |      |      |      |       |       |       |       |      |      |       |      |        |       |
|-----------------------|------------------|--------------|-------|------|------|------|-------|-------|-------|-------|------|------|-------|------|--------|-------|
| <b>mmu-miR-30e</b>    | mmu-miR-30e-5p   | MIMAT0000248 | -1.05 | 0.02 |      |      |       |       | 0.46  |       | 0.58 | 0.93 | -0.91 | 1.09 | -6.66  | -0.25 |
| <b>mmu-miR-872</b>    | mmu-miR-872-5p   | MIMAT0004934 | -2.17 | 0.02 | 0.67 | 0.05 | -0.22 |       | -6.44 | -0.12 | 0.46 |      |       |      | -4.24  |       |
| <b>mmu-miR-192</b>    | mmu-miR-192-5p   | MIMAT0000517 | -1.02 | 0.02 |      |      |       |       | -1.93 |       |      |      |       |      |        |       |
| <b>mmu-miR-30c-2*</b> | mmu-miR-30c-2-3p | MIMAT0005438 | -1.83 | 0.02 |      |      |       |       |       | -0.06 |      |      |       |      |        |       |
| <b>mmu-miR-455*</b>   | mmu-miR-455-5p   | MIMAT0003485 | -1.44 | 0.03 |      |      |       |       | -0.08 | -0.18 |      | 0.07 |       |      | -3.41  |       |
| <b>mmu-miR-22</b>     | mmu-miR-22-3p    | MIMAT0000531 | -0.93 | 0.03 | 0.66 | 0.28 | -0.33 | 11.96 | -7.80 | -0.22 | 0.82 | 0.44 | -1.20 | 4.99 | -10.24 | -0.55 |
| <b>mmu-miR-29c</b>    | mmu-miR-29c-3p   | MIMAT0000536 | -1.01 | 0.03 |      | 0.33 |       |       | -2.31 | -0.07 | 0.54 | 0.69 | -0.20 |      | 4.11   | -0.10 |
| <b>mmu-miR-187</b>    | mmu-miR-187-3p   | MIMAT0000216 | -1.76 | 0.03 |      |      |       |       | -7.30 |       |      |      |       |      |        |       |
| <b>mmu-miR-148a</b>   | mmu-miR-148a-3p  | MIMAT0000516 | -0.91 | 0.04 |      | 0.04 |       |       | -2.82 | -0.14 |      |      |       |      |        |       |
| <b>mmu-miR-30a</b>    | mmu-miR-30a-5p   | MIMAT0000128 | -0.9  | 0.04 |      |      |       |       | 1.86  |       | 0.55 | 0.93 | -0.92 | 1.09 | -5.56  | -0.22 |
| <b>mmu-miR-7a</b>     | mmu-miR-7a-5p    | MIMAT0000677 | -1.27 | 0.04 |      |      |       |       | -6.17 | -0.11 | 0.50 |      | -0.15 |      | -6.30  |       |
| <b>mmu-miR-101a*</b>  | mmu-miR-101a-5p  | MIMAT0004526 | -1.65 | 0.04 |      |      |       |       |       | -0.01 | 0.73 |      | -1.25 |      |        | -0.18 |
| <b>mmu-miR-345-3p</b> | mmu-miR-345-3p   | MIMAT0004656 | -2.33 | 0.04 |      | 0.06 |       |       | -5.74 | -0.08 |      |      |       |      |        | -0.07 |
| <b>mmu-miR-31</b>     | mmu-miR-31-5p    | MIMAT0000538 | -1.02 | 0.04 |      |      | -0.40 |       | -7.60 |       | 0.95 | 0.24 |       |      | -9.60  |       |
| <b>mmu-miR-22*</b>    | mmu-miR-22-5p    | MIMAT0004629 | -1.07 | 0.04 | 0.49 |      |       |       |       |       | 0.69 |      |       |      |        |       |
| <b>mmu-miR-107</b>    | mmu-miR-107-3p   | MIMAT0000647 | -0.98 | 0.04 |      |      |       |       | -7.69 | -0.01 |      |      |       |      | -7.43  | -0.14 |

|                     |                 |              |       |      |  |  |  |  |       |       |  |  |  |  |  |       |
|---------------------|-----------------|--------------|-------|------|--|--|--|--|-------|-------|--|--|--|--|--|-------|
| <b>mmu-miR-122</b>  | mmu-miR-122-5p  | MIMAT0000246 | -0.87 | 0.05 |  |  |  |  | -9.54 |       |  |  |  |  |  |       |
| <b>mmu-miR-378*</b> | mmu-miR-378a-5p | MIMAT0000742 | -1.25 | 0.05 |  |  |  |  | -6.00 | -0.02 |  |  |  |  |  | -0.08 |

**Supplementary Table 5.** Primers list.

| <b>Gene</b>                      | <b>Forward primer</b>          |
|----------------------------------|--------------------------------|
|                                  | <b>Reverse primer</b>          |
| <b>hSIRT1</b>                    | 5' GCGGGAATCCAAAGGATAAT 3'     |
|                                  | 5' CTGTTGCAAAGGAACCATGA 3'     |
| <b>h<math>\beta</math>-ACTIN</b> | 5' TCCCTGGAGAAGAGCTACGA 3'     |
|                                  | 5' AGCACTGTGTTGGCGTACAG 3'     |
| <b>hGAPDH</b>                    | 5' AATCCCATCACCATCTTCCA 3'     |
|                                  | 5' TGGACTCCACGACGTACTCA 3'     |
| <b>hPPAR<math>\alpha</math></b>  | 5' CATTACGGAGTCCACGCGT 3'      |
|                                  | 5' ACCAGCTTGAGTCGAATCGTT 3'    |
| <b>hACAA2</b>                    | 5' CTGCTCCGAGGTGTGTTTGTA 3'    |
|                                  | 5' GGCAGCAAATTCAGACAAGTCA 3'   |
| <b>hDEC1</b>                     | 5' CTATGCTGAGACTGGTTCAGGT 3'   |
|                                  | 5' CCAGACGGCTAAAGGCACC 3'      |
| <b>hDEC2</b>                     | 5' TCCTTCAACGCCTTCAAGACC 3'    |
|                                  | 5' GGTGGCAGTGATGTTTACGAT 3'    |
| <b>hMLYCD</b>                    | 5' ACGTCCGGGAAATGAATGGG 3'     |
|                                  | 5' GTAACCCGTTCTAGGTTTACAGGA 3' |
| <b>hHADH_B</b>                   | 5' CTGTCCAGACCAAAACGAAGAA 3'   |
|                                  | 5' CGATGCAACAAACCCGTAAGC 3'    |
| <b>hCORT</b>                     | 5' GCCTCCTGACTTTCCTCGC 3'      |
|                                  | 5' GGGCTTCCTCTCCTATGAGGG 3'    |

|                                    |                                               |
|------------------------------------|-----------------------------------------------|
| <b>hCPT2</b>                       | 5' CATAACAAGCTACATTTTCGGGACC 3'               |
|                                    | 5' AGCCCGGAGTGTCTTCAGAA 3'                    |
| <b>hPri-MIR-22</b>                 | 5' GCTGAGCCGCAGTAGTTCTT 3'                    |
|                                    | 5' GGCAGAGGGCAACAGTTCTT 3'                    |
| <b>hp21</b>                        | 5' TGAGCCGCGACTGTGATG 3'                      |
|                                    | 5' GTCTCGGTGACAAAGTCGAGGTT 3'                 |
| <b>hBAX</b>                        | 5' GCTGTTGGGCTGGATCCAAG 3'                    |
|                                    | 5' TCAGCCCATCTTCTTCCAGA 3'                    |
| <b>hPUMA</b>                       | 5' GGAGACAAGAGGAGCAG 3'                       |
|                                    | 5' CTGGGTAAGGGCAGGAGT 3'                      |
| <b>hPPAR<math>\alpha</math>_SG</b> | Qiagen QuantiTect Primer Assay-<br>QT00017451 |
| <b>mSirt1</b>                      | 5' ATGACGCTGTGGCAGATTGTT 3'                   |
|                                    | 5' CCGCAAGGCGAGCATAGAT 3'                     |
| <b>m<math>\beta</math>-Actin</b>   | 5'GGCTGTATTCCCCTCCATCG 3'                     |
|                                    | 5' CCAGTTGGTAACAATGCCATGT 3'                  |
| <b>mGapdh</b>                      | 5' AGGTCGGTGTGAACGGATTTG 3'                   |
|                                    | 5' TGTAGACCATGTAGTTGAGGTCA 3'                 |
| <b>mPpara</b>                      | 5' TACTGCCGTTTTTCACAAGTGC 3'                  |
|                                    | 5' AGGTCGTGTTACAGGTAAGA 3'                    |
| <b>mAcaa2</b>                      | 5' ATGTGCGCTTCGGAACCAAA 3'                    |
|                                    | 5' CAAGGCGTATCTGTCACAGTC 3'                   |
| <b>mDecri1</b>                     | 5' GATCCGGGTCCTCAGAGGTTT 3'                   |
|                                    | 5' ATCAGGTGGTAGCATAGGCTT 3'                   |

|                    |                                               |
|--------------------|-----------------------------------------------|
| <b>mDecr2</b>      | 5' CACGGCTGCTAAGAAGTTGGT 3'                   |
|                    | 5' AGCTGCACAGTTAATGAGGATG 3'                  |
| <b>mMlycD</b>      | 5' GCACGTCCGGGAAATGAAC 3'                     |
|                    | 5' GCCTCACACTCGCTGATCTT 3'                    |
| <b>mHadh_B</b>     | 5' ACTACATCAAAATGGGCTCTCAG 3'                 |
|                    | 5' AGCAGAAATGGAATGCCGACC 3'                   |
| <b>mCort</b>       | 5' GAGCGGCCTTCTGACTTTCC 3'                    |
|                    | 5' GGGCTTTTTATCCAGGTGTGG 3'                   |
| <b>mCpt2</b>       | 5' CAGCACAGCATCGTACCCA 3'                     |
|                    | 5' TCCAATGCCGTTCTCAAAT 3'                     |
| <b>mPri-miR-22</b> | 5' GCTGAGCCGCAGTAGTTCTTC 3'                   |
|                    | 5' GCAGAGGGCAACAGTTCTTCAA 3'                  |
| <b>mPpara_SG</b>   | Qiagen QuantiTect Primer Assay-<br>QT00137984 |
